# Supplementary material
Source: ML conference proceedings conference paper supplement (https://openreview.net/forum?id=PfBYdizaId)
Supplement: supplementary_material [file attachment]

# Imaginative Perception Tokens Enhance Spatial Reasoning in Multimodal Language Models

## Supplementary Material

### 780 7. Training Details and Hyperparameters

#### 781 7.1. Training Setup

782 We fine-tune BAGEL-7B-MoT [12] using PyTorch FSDP  
783 (Fully Sharded Data Parallel) with bf16 mixed precision  
784 on 8 NVIDIA A100 80 GB GPUs. Table 7 summarizes the  
785 key hyperparameters.

786 **System prompts.** All training modes share one of two sys-  
787 tem prompts prepended to every input:

- 788 • **Thinking prompt** (used for IPT, Text CoT, and label-  
789 only):

790 *Let's think step by step to answer the ques-*  
791 *tion. For text-based thinking, enclose the process*  
792 *within <think> </think>. For visual think-*  
793 *ing, enclose the content within <image\_start>*  
794 *</image\_end>. Finally conclude with the final*  
795 *answer wrapped in <answer></answer> tags.*

- 796 • **Answer-only prompt** (used for the answer-only portion  
797 of mixed training):

798 *Answer the question directly. Wrap your answer*  
799 *in <answer></answer> tags. Do not think or*  
800 *generate any images.*

801 **Training modes.** Table 8 summarizes the five training con-  
802 figurations evaluated in this work. Each mode differs in the  
803 output format the model is trained to produce, and corre-  
804 spondingly in which loss terms are active. In IPT mode,  
805 both  $\mathcal{L}_{fm}$  and  $\mathcal{L}_{lm}$  are active; in Text CoT and label-only,  
806 only  $\mathcal{L}_{lm}$  is used.

807 **Mixed training.** Mixed training combines 50% IPT ex-  
808 amples (with the thinking prompt and visual generation  
809 targets) and 50% answer-only examples (with the answer-  
810 only prompt and direct answers). The two data subsets  
811 are mixed at the dataloader level: both dataset names and  
812 sample counts are specified in the training configuration,  
813 and the dataloader interleaves batches from both sources.  
814 The model learns to switch between generating imaginative  
815 perception tokens and producing direct answers based on  
816 which system prompt is provided, enabling a single check-  
817 point to operate in either mode at inference time.

818 **Text CoT generation.** Text chain-of-thought training tar-  
819 gets are generated by GPT-5.1 using ground-truth scene  
820 metadata from the simulator. For each training example,  
821 GPT-5.1 receives the input image, the ground-truth answer,  
822 and a task-specific instruction, and produces a step-by-step  
823 textual reasoning trace (100–300 words). Below we de-  
824 scribe the task-specific prompts.

**Path tracing CoT prompt.** The system prompt instructs  
the model to act as a spatial reasoning AI that solves indoor  
navigation questions by analyzing top-down views step by  
step. The task instruction is:

*You are navigating along a numbered path through an*  
*indoor scene. The top-down view shows the path with*  
*waypoints and midpoints. You need to determine what*  
*object is visible from a specific side (left or right) at a*  
*midpoint.*

*Reason step by step: (1) Identify the path direction*  
*(which waypoint to which). (2) Determine your ori-*  
*entation at the midpoint. (3) Figure out what “left”*  
*or “right” means given that orientation. (4) Analyze*  
*the top-down layout to identify objects on that side.*  
*(5) Compare against the answer choices and eliminate*  
*wrong ones.*

Figure 3 shows three Text CoT training examples for path  
tracing in the EgoDir setting, illustrating how the generated  
reasoning traces analyze the top-down layout, determine the  
agent’s orientation at the midpoint, and systematically elim-  
inate incorrect answer choices.

**Perspective Taking CoT prompt.** For Perspective Tak-  
ing, the model receives the input image together with priv-  
ileged hidden information, the ground-truth answer and a  
second image showing the target view after the camera mo-  
tion, to ensure correctness. The generated chain-of-thought  
must be written as if only the original image and question  
were available, without referencing any hidden information.  
The prompt is:

*You generate student-facing chain-of-thought explana-*  
*tions for visual navigation/spatial reasoning from a*  
*single image. You may receive hidden privileged in-*  
*formation (metadata, ground-truth answer, and a sec-*  
*ond image) to ensure correctness, but your explanation*  
*must be written as if you only saw the original image*  
*and question. Do not mention, quote, paraphrase, or*  
*allude to any hidden information.*

*Student-visible input (ONLY what the explanation may*  
*reference): (1) Image A (original scene with a red “X”*  
*on the floor). (2) Question: {Q}*

*Hidden privileged information (FOR CORRECTNESS*  
*ONLY — MUST NOT APPEAR IN THE EXPLANA-*  
*TION): (1) Correct answer: {A} (2) Image B (ground-*  
*truth final view after moving and turning)*

Table 7. Training hyperparameters.

| Parameter                                        | Value                                                    |
|--------------------------------------------------|----------------------------------------------------------|
| Optimizer                                        | AdamW ( $\beta_1=0.9, \beta_2=0.95, \epsilon=10^{-15}$ ) |
| Learning rate                                    | $1 \times 10^{-5}$ (constant after warmup)               |
| Warmup steps                                     | 2,000                                                    |
| Gradient clipping                                | max norm = 1.0                                           |
| EMA decay                                        | 0.9999                                                   |
| Max tokens per batch                             | 32,768                                                   |
| Max tokens per sample                            | 24,576                                                   |
| Input image resolution                           | 1024 $\times$ 1024 (PET) / 512 $\times$ 512 (PT, MVC)    |
| IPT latent resolution                            | 64 $\times$ 64 (Latent-64)                               |
| Flow-matching loss weight ( $\lambda_{fm}$ )     | 1.0                                                      |
| Language modeling loss weight ( $\lambda_{lm}$ ) | 1.0                                                      |
| Frozen modules                                   | VAE encoder & decoder                                    |
| Fine-tuned modules                               | LLM (all layers), ViT encoder, connector                 |

Table 8. Training modes and their output formats. [IMG] denotes the generated intermediate image tokens.

| Mode       | Prompt                      | Training target                                                                   |
|------------|-----------------------------|-----------------------------------------------------------------------------------|
| Label-only | Think                       | <answer>A</answer>                                                                |
| Text CoT   | Think                       | <think>reasoning</think><br><answer>A</answer>                                    |
| IPT        | Think                       | <think>task prompt</think><br><image_start>[IMG]<image_end><br><answer>A</answer> |
| Mixed      | 50% Think /<br>50% Ans-only | 50% IPT +<br>50% answer-only                                                      |

869 *Task: Write a chain-of-thought that a student could*  
 870 *produce from Image A and the question alone (not more*  
 871 *than 10 sentences).*

872 *Hard constraints: Do NOT mention Image B, meta-*  
 873 *data, coordinates, angles, yaw/pitch/roll, agent states,*  
 874 *movement info, IDs, or any numbers from the hidden*  
 875 *block. The explanation must be plausible using only*  
 876 *Image A: talk only about visible objects, their relative*  
 877 *positions, and the effect of turning left/right. Keep it*  
 878 *short (3–6 steps). No extra commentary. End with*  
 879 *the correct final answer: My answer is [A]/[B]. Do*  
 880 *not answer based on your own perspective; stick to the*  
 881 *ground-truth answer provided.*

882 *Output format:*  
 883 *Step 1: Identify the object in the question and describe*  
 884 *its relative location in the original view.*  
 885 *Step 2: Describe the walk-to-X action (translation*  
 886 *without changing facing direction).*  
 887 *Step 3: Describe the turn action (update egocentric*  
 888 *left/right).*  
 889 *Step 4: Conclude whether the object is on the left or*  
 890 *right relative to the agent.*

891 An example of a generated thought:

892 *Step 1: The oven is on the right wall of the kitchen, a*  
 893 *bit ahead of the current viewpoint, and the red X is on*  
 894 *the floor between the viewer and that oven wall. Step 2:*  
 895 *Walking straight to the X without turning keeps me fac-*  
 896 *ing the same direction, so I move forward toward the*  
 897 *area in front of the oven and end up nearer that wall.*  
 898 *Step 3: From the X, turning right 90 degrees means I*  
 899 *would now face the wall with the oven and cabinets.*  
 900 *Step 4: Since I walked closer to that wall before turn-*  
 901 *ing, I end up standing nearer to the oven than I was at*  
 902 *the start. My answer is [A].*

903 **Multiview Counting CoT prompt.** For Multiview  
 904 Counting, the model receives per-frame metadata listing  
 905 which object instances (by ID) are visible in each frame,  
 906 and is asked to produce a frame-by-frame reasoning trace  
 907 without directly referencing the hidden instance IDs. The  
 908 prompt is:

909 *You are given an object-counting question based on*  
 910 *multiple images from the same scene. You will be pro-*  
 911 *vided with: the target object, the correct total count,*  
 912 *and frame-level information listing which object in-*  
 913 *stances are visible in each frame (this information is*  
 914 *hidden and should not be referenced directly).*

## Text CoT Training Examples (Path Tracing, EgoDir)

**Question:** You are navigating from waypoint 1 to 2, passing through M1, and viewing the space from a top-down perspective as shown in <image\_1>. At point 1, I'm facing forward and see: <image\_2>. At point 2, facing forward: <image\_3>. Which object can you see on your **left** side at waypoint M1?

A: the countertop ✓  B: the house plant  C: the dining table  D: the dresser

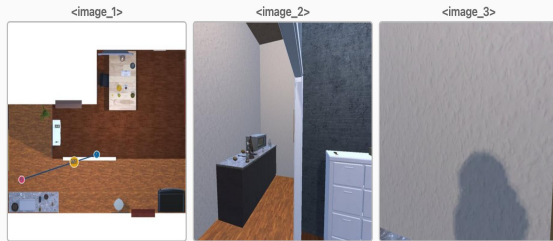**Generated Text CoT:**

From the top-down map, the path goes from waypoint 1 (to the right) toward waypoint 2 (down-left), with M1 located slightly left of 1 along that diagonal segment. So at M1, "forward" is oriented down-left (southwest on the map). Facing southwest, the "left side" corresponds to the southeast side of the path (down-right relative to the direction of travel).

Looking at the top-down layout around M1: a long white counter run is positioned just to the right (east/southeast) of M1, aligned roughly horizontally near waypoint 1. The house plant is up-left (northwest) of M1, which would be on the right side when facing southwest. The dining table is far up-right, not adjacent to M1's left side. The dresser/cabinet block is also up-left of M1, again on the right side for this heading.

Therefore, the object visible on the left side at waypoint M1 is **the countertop (A)**.

**Question:** You are navigating from waypoint 1 to 2, passing through M1, and viewing the path from a top-down perspective as shown in <image\_1>. At point 1, I'm facing forward and see: <image\_2>. At point 2, facing forward: <image\_3>. Which object can you see on your **left** side at waypoint M1?

A: a book ✓  B: a shelving unit  C: a garbage bag  D: a stool

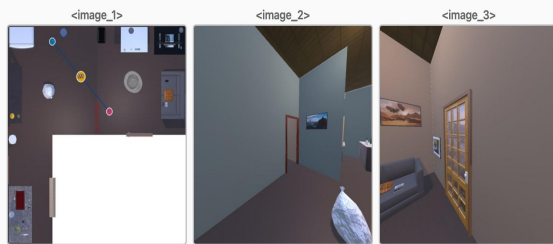**Generated Text CoT:**

From the top-down map, the path goes diagonally from waypoint 1 (upper-left) to waypoint 2 (lower-right), with M1 in between. So at M1, "forward" means continuing along that same diagonal toward waypoint 2 (southeast). Facing southeast, your left side points toward the northeast (up-right on the map).

Using the egocentric views to anchor objects: at waypoint 2 we see a couch area with a small rectangular object on the couch that looks like a book. On the top-down view, that couch is on the right side of the room, above and to the right of waypoint 2, i.e., on the northeast side relative to M1.

Now check the choices against the left (northeast) side at M1: the garbage bag is positioned left-of-center (more west), not on the northeast side; the shelving unit appears in the far top-right but is farther and not the prominent item; the stool is near the center-right but not as clearly on the left-of-forward line at M1. The book on/near the couch lies on M1's left side when moving toward 2.

Therefore, the object visible on the left at M1 is **the book (A)**.

**Question:** You are following the path 1→2, looking at a top-down view at waypoint M1 as shown in <image\_1>. This is what you see looking forward from point 1: <image\_2>. This is what you see looking forward from point 2: <image\_3>. Which object can you see on your **left** side at waypoint M1?

A: the floor lamp  B: the armchair ✓  C: the sink  D: the bed

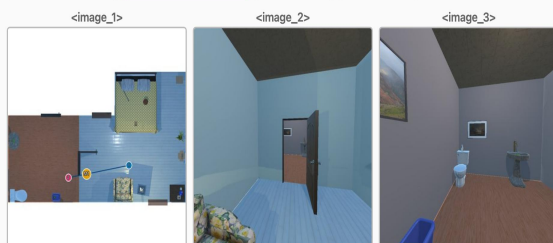**Generated Text CoT:**

From the top-down map, the path goes from waypoint 1 on the right side of the blue-floored bedroom area toward waypoint 2 in the brown-floored bathroom area on the left. So at the midpoint M1, our forward travel direction is generally leftward (west) toward the bathroom doorway.

To interpret "left side" at M1, take that forward direction (toward 2); left of a westward heading is south (down on the map). Looking at the layout around M1, the large floral armchair sits in the lower (southern) part of the blue bedroom area, just below the path near waypoint 1/M1. The bed is far up at the top of the bedroom, so it would be on the right side (north) relative to the westward heading, not the left. The sink is inside the bathroom area to the left of the doorway, ahead/left but separated by the doorway and not on the immediate left side at M1. A floor lamp is not positioned on the south side near M1.

Therefore, the object visible on the left at M1 is **the armchair (B)**.

Figure 3. **Text CoT training examples for path tracing (EgoDir setting).** Each example shows the input images (top-down map and egocentric views at endpoints), the question with answer choices, and the GPT-5.1-generated reasoning trace. The reasoning follows the structured prompt: identifying path direction, determining orientation at  $M_1$ , interpreting left/right relative to that orientation, and eliminating distractors.

915 *IMPORTANT: An empty list for a frame means that no*  
916 *objects of the target type are visible in that frame.*

917 *Write a brief, frame-by-frame explanation describing*  
918 *what is visible in each frame. Do not mention object*

*IDs or refer to them explicitly. When explaining each*  
*frame, do not count objects that were already visible in*  
*previous frames. After the frame-by-frame explanation,*  
*conclude with: "The total number is X."*

919  
920  
921  
922

|     |                                                                                 |      |
|-----|---------------------------------------------------------------------------------|------|
| 923 | <i>Object: {O}</i>                                                              | 969  |
| 924 | <i>Correct total count: {answer}</i>                                            | 970  |
| 925 | <i>Frames: {frames_text}</i>                                                    | 971  |
| 926 | An example of a generated thought:                                              | 972  |
| 927 | <i>Frame 1: No bowls are visible. Frame 2: A bowl ap-</i>                       | 973  |
| 928 | <i>pears and is visible for the first time. Frame 3: No new</i>                 | 974  |
| 929 | <i>bowls appear; the same bowl from before may still be</i>                     |      |
| 930 | <i>present. The total number is 1.</i>                                          |      |
| 931 | <b>7.2. Evaluation Setup</b>                                                    |      |
| 932 | <b>Inference parameters.</b> Table 9 lists the inference hyperpa-               |      |
| 933 | rameters used across all evaluations.                                           |      |
| 934 | <b>Evaluation modes.</b> At inference, each model variant                       |      |
| 935 | is evaluated in the mode that matches its training con-                         |      |
| 936 | figuration. IPT models are evaluated in two settings:                           |      |
| 937 | (1) <i>imagination mode</i> , where the model generates an in-                  |      |
| 938 | termediate image before answering, and (2) <i>answer-only</i>                   |      |
| 939 | <i>mode</i> , where the model produces only a text answer with-                 |      |
| 940 | out generating any image. For models trained with vi-                           |      |
| 941 | ual generation (IPT, Mixed), the VAE weights are al-                            |      |
| 942 | ways loaded ( <code>visual_gen=True</code> ), and input images                  |      |
| 943 | are encoded through both the ViT and VAE pathways                               |      |
| 944 | ( <code>vae_input=True</code> ) to match the training-time encoding.            |      |
| 945 | Without setting <code>vae_input=True</code> , a train-eval mismatch             |      |
| 946 | would occur: during training, input images pass through                         |      |
| 947 | both VAE and ViT, but the default evaluation behavior sends                     |      |
| 948 | inputs through ViT only. <sup>1</sup>                                           |      |
| 949 | <b>Answer extraction.</b> We extract the predicted answer let-                  |      |
| 950 | ter from model outputs using a cascading rule-based proce-                      |      |
| 951 | cedure: (1) parse <code>&lt;answer&gt;X&lt;/answer&gt;</code> tags; (2) extract |      |
| 952 | from <code>\boxed{X}</code> format; (3) match patterns such as “the             |      |
| 953 | answer is X”; (4) detect bold letter formatting ( <code>**X**</code> );         |      |
| 954 | (5) fall back to the last single letter in the response. All                    |      |
| 955 | benchmarks use the same unified scoring function that com-                      |      |
| 956 | pares the extracted letter against the ground-truth answer.                     |      |
| 957 | <b>8. Data Curation Details</b>                                                 |      |
| 958 | <b>8.1. Path Tracing</b>                                                        |      |
| 959 | We generate path tracing data from two sources: AI2-                            |      |
| 960 | THOR (synthetic) and Matterport3D (real-world).                                 |      |
| 961 | <b>8.1.1. AI2-THOR</b>                                                          |      |
| 962 | <b>Scene selection.</b> We use 120 standard iTHOR [20] scenes                   |      |
| 963 | spanning four room types (kitchens, living rooms, bed-                          |      |
| 964 | rooms, bathrooms), with 30 scenes per type, split into train                    |      |
| 965 | (20), val (5), and test (5) per type. The training set ad-                      |      |
| 966 | ditionally incorporates procedurally generated houses from                      |      |
| 967 | ProcTHOR-10k [10], which include a fifth room type (hall-                       |      |
| 968 | ways, offices, dining rooms).                                                   |      |
|     | <b>Path sampling.</b> For each scene, we sample feasible two-                   | 969  |
|     | waypoint paths on the navigation mesh, balanced across                          | 970  |
|     | room types and three distance bins: short (1–2 m), medium                       | 971  |
|     | (2–4 m), and long ( $\geq 4$ m). Grid-based path sampling uses                  | 972  |
|     | a spacing of 0.5 m with a minimum waypoint separation of                        | 973  |
|     | 1.0 m.                                                                          | 974  |
|     | <b>Camera configuration.</b> All views are rendered at $1024 \times$            | 975  |
|     | $1024$ resolution. To increase viewpoint diversity, we ran-                     | 976  |
|     | domize the camera height (sampled from seven values be-                         | 977  |
|     | tween 1.4 and 1.8 m), field of view (75–120), and pitch (–5                     | 978  |
|     | to 5).                                                                          | 979  |
|     | <b>Rendering.</b> At each sample we render top-down views,                      | 980  |
|     | egocentric forward views at both endpoints, and a sweep                         | 981  |
|     | of candidate sideviews at the midpoint $M_1$ . The sideview                     | 982  |
|     | sweep covers 7 yaw angles $\times$ 7 horizontal offsets $\times$ 3 pitch        | 983  |
|     | values, yielding 147 candidate views per midpoint. We se-                       | 984  |
|     | lect the sideview that best exposes the queried object using                    | 985  |
|     | simulator segmentation masks, requiring a minimum object                        | 986  |
|     | coverage of 0.15% of the image area and a maximum view                          | 987  |
|     | angle of 90 relative to the path direction.                                     | 988  |
|     | <b>Question generation.</b> Questions are generated from tem-                   | 989  |
|     | plates (“Which object can you see on your {side} at way-                        | 990  |
|     | point $M_1$ ?”) with four choices: the correct answer drawn                     | 991  |
|     | from verified visible objects and three distractors drawn                       | 992  |
|     | from the opposite side or a global object pool. Each base                       | 993  |
|     | MCQ is expanded into eight input variants by combining                          | 994  |
|     | different image types (top-down path, top-down with arrow,                      | 995  |
|     | top-down with midpoint marker, dollhouse view) and ego-                         | 996  |
|     | centric cue availability (with/without endpoint views).                         | 997  |
|     | <b>TIFA filtering.</b> We apply TIFA-style filtering [16] to en-                | 998  |
|     | sure question quality. Each candidate is decomposed into                        | 999  |
|     | binary visibility queries and verified by GPT-4.1 with three-                   | 1000 |
|     | round majority voting, using early exit after round 2 when                      | 1001 |
|     | unanimous. Samples are dropped if (1) the correct answer                        | 1002 |
|     | is not visible in the sideview, (2) a distractor is also visible                | 1003 |
|     | in the sideview, or (3) the model answers incorrectly even                      | 1004 |
|     | when provided the sideview. We further remove samples                           | 1005 |
|     | where GPT-4.1 answers correctly from the top-down view                          | 1006 |
|     | and egocentric endpoint views alone, ensuring the bench-                        | 1007 |
|     | mark requires genuine spatial imagination.                                      | 1008 |
|     | <b>Debiasing.</b> Answer choices are reshuffled with per-                       | 1009 |
|     | sample deterministic seeds to remove positional bias. We                        | 1010 |
|     | additionally verify that per-object and per-room answer dis-                    | 1011 |
|     | tributions remain approximately uniform.                                        | 1012 |
|     | <b>Statistics.</b> The synthetic training set contains 11,204 ex-               | 1013 |
|     | amples.                                                                         | 1014 |

<sup>1</sup>For Path-Tracing, we found that setting `vae_input=False` actually improves generalization to real environments.

Table 9. Inference hyperparameters for evaluation.

| Parameter                  | Value                              |
|----------------------------|------------------------------------|
| Text temperature           | 0.3                                |
| Sampling                   | do_sample = True                   |
| Max thinking tokens        | 4,096                              |
| Diffusion timesteps        | 50                                 |
| Timestep shift             | 3.0                                |
| Text CFG scale             | 4.0                                |
| Image CFG scale            | 2.0                                |
| CFG interval               | [0.0, 1.0]                         |
| Generated image resolution | 1024 × 1024                        |
| Max generation rounds      | 1                                  |
| GPU allocation             | 2 × A100 80 GB (model parallelism) |

### 1015 8.1.2. Real-World Data (Matterport3D)

1016 To evaluate cross-domain transfer, we construct a real-  
1017 world test set from Matterport3D [6] top-down views.

1018 **Image collection.** We collect top-down screenshots from  
1019 Matterport 3D indoor tours, capturing per-floor views with  
1020 UI elements removed and dark borders cropped.

1021 **Auto-annotation.** We annotate walking paths on each im-  
1022 age using a two-pass GPT pipeline. In the first pass, GPT  
1023 proposes  $N$  candidate walking paths, each defined by three  
1024 waypoints (start “1”, midpoint “M1”, end “2”) placed on  
1025 open floor areas. In the second pass, the proposed way-  
1026 points are drawn on the image and GPT is asked to (a) ver-  
1027 ify that  $M_1$  lies on walkable floor, adjusting its position if  
1028 necessary, and (b) identify 2–5 visible furniture items or ob-  
1029 jects on each side (left/right) of the path at  $M_1$ .

1030 **Post-processing.** Several geometric filters are applied to  
1031 ensure path quality. Waypoints are clamped to image  
1032 bounds, and paths shorter than 30% of the shorter image  
1033 dimension are rejected.  $M_1$  is snapped onto the line seg-  
1034 ment between waypoints 1 and 2 and constrained to the  
1035 [0.2, 0.8] interval to avoid proximity to endpoints. Paths  
1036 that traverse dark or background regions (more than 20%  
1037 dark pixels along the path) are discarded.

1038 **TIFA filtering.** Because no side-view images exist for  
1039 real environments, TIFA verification operates on the top-  
1040 down image only. We verify three properties: (1) all three  
1041 waypoints lie on walkable floor (not on furniture, walls, or  
1042 background); (2) each annotated object is visible in the im-  
1043 age; and (3) each object is on the correct side of the path.  
1044 Paths with fewer than 2 verified objects on either side are  
1045 dropped. Majority voting across up to 3 rounds is used,  
1046 with early exit when the first two rounds agree.

**Human review.** After automated filtering, all surviving  
1047 annotations undergo human review, where annotators can  
1048 approve, delete, or edit individual paths and their associated  
1049 object lists. 1050

**Question generation.** Each verified path yields eight  
1051 question variants (forward/reverse × left/right × arrow/no-  
1052 arrow). When the walking direction is reversed ( $2 \rightarrow 1$ ),  
1053 left and right swap because the agent faces the opposite di-  
1054 rection. Distractors are drawn from opposite-side objects  
1055 first, then supplemented from a global pool of 50 com-  
1056 mon indoor objects. Answer choices are shuffled with per-  
1057 sample deterministic seeds to eliminate positional bias. Be-  
1058 cause the real environments lack egocentric viewpoints, we  
1059 evaluate on the Path and PathArr settings only. The real-  
1060 world benchmark contains 332 human-verified questions. 1061

## 8.2. Perspective Taking 1062

We generate perspective taking data from three sources:  
1063 AI2-THOR (synthetic), Habitat (photorealistic scans), and  
1064 Visual Spatial Tuning (real-world images). All sources  
1065 share the same task structure—given a first-person view  
1066 with a marked target position, answer a spatial question  
1067 about the scene from the new viewpoint—but differ in vi-  
1068 sual domain and 3D engine. 1069

### 8.2.1. AI2-THOR 1070

**Scene selection.** We use procedurally generated indoor  
1071 scenes from ProcTHOR [10], which provides diverse house  
1072 layouts with varied room configurations. For each scene, we  
1073 sample multiple camera positions from the navigable area  
1074 and generate perspective-taking examples at each position. 1075

**Target position placement.** The target position (marked  
1076 with a red “X” on the input image) is determined by ray-  
1077 casting from the camera into the scene. To ensure physically  
1078 plausible movement targets, we filter ray hits to *ground-only*  
1079 surfaces: floors, carpets, rugs, and tiles. Hits on furniture,  
1080

|      |                                                                                                                                                        |      |
|------|--------------------------------------------------------------------------------------------------------------------------------------------------------|------|
| 1081 | tabletops, or other elevated surfaces are rejected. The hit                                                                                            |      |
| 1082 | point must lie within $\pm 0.2$ m of the ground-level height. Up                                                                                       |      |
| 1083 | to 40 raycasting attempts are made per sample; if no valid                                                                                             |      |
| 1084 | ground hit is found, the sample is skipped.                                                                                                            |      |
| 1085 | <b>Viewpoint transformation.</b> The agent is teleported to the                                                                                        |      |
| 1086 | target position and rotated 90 in a randomly chosen direc-                                                                                             |      |
| 1087 | tion (left or right with equal probability), simulating a re-                                                                                          |      |
| 1088 | alistic movement-and-turn action. A ground-truth novel-                                                                                                |      |
| 1089 | viewpoint image is rendered at this new pose to serve as                                                                                               |      |
| 1090 | the imaginative perception target.                                                                                                                     |      |
| 1091 | <b>Object filtering.</b> To ensure well-defined questions, target                                                                                      |      |
| 1092 | objects must satisfy several criteria:                                                                                                                 |      |
| 1093 | • Visible in <i>both</i> the original and new viewpoint (dual-view                                                                                     |      |
| 1094 | visibility).                                                                                                                                           |      |
| 1095 | • Occupy at least 0.4% of the image area.                                                                                                              |      |
| 1096 | • Lie within 5 m of the camera.                                                                                                                        |      |
| 1097 | • Fall at least 150 px from the image edge (to avoid partially                                                                                         |      |
| 1098 | visible objects).                                                                                                                                      |      |
| 1099 | • For relative position questions: the object must be unam-                                                                                            |      |
| 1100 | biguously on one side of the image center, with a 150 px                                                                                               |      |
| 1101 | margin from the center line.                                                                                                                           |      |
| 1102 | Additionally, we enforce a <i>left-right eligibility</i> constraint:                                                                                   |      |
| 1103 | an object is only used for relative position questions if it                                                                                           |      |
| 1104 | appears on at most one side of the image (not straddling the                                                                                           |      |
| 1105 | center), ensuring that the left/right answer is unambiguous.                                                                                           |      |
| 1106 | <b>Question generation.</b> We generate two types of questions                                                                                         |      |
| 1107 | with 10 template variants each, varying in person perspec-                                                                                             |      |
| 1108 | tive (first, second, third person) and formality level:                                                                                                |      |
| 1109 | • <b>Distance change:</b> “After moving to ‘X’ and turning                                                                                             |      |
| 1110 | {direction} 90, will the {object} get closer or further?”                                                                                              |      |
| 1111 | Requires a minimum distance change of $\pm 0.5$ m between                                                                                              |      |
| 1112 | the old and new camera positions.                                                                                                                      |      |
| 1113 | • <b>Relative position:</b> “After moving to ‘X’ and turning                                                                                           |      |
| 1114 | {direction} 90, will the {object} be on your left or right?”                                                                                           |      |
| 1115 | Left/right is determined by the object’s 2D position in the                                                                                            |      |
| 1116 | new-viewpoint image.                                                                                                                                   |      |
| 1117 | <b>Sub-categories.</b> As described in Sec. 3.1, the six balanced                                                                                      |      |
| 1118 | sub-categories arise from the combination of question type                                                                                             |      |
| 1119 | and answer: two for distance change ( <i>closer</i> , <i>further</i> ) and                                                                             |      |
| 1120 | four for relative position ( <i>left</i> $\rightarrow$ <i>left</i> , <i>left</i> $\rightarrow$ <i>right</i> , <i>right</i> $\rightarrow$ <i>left</i> , |      |
| 1121 | <i>right</i> $\rightarrow$ <i>right</i> ), where the notation indicates the object’s lat-                                                              |      |
| 1122 | eral position before and after the viewpoint transformation.                                                                                           |      |
| 1123 | The training set is balanced across all six sub-categories.                                                                                            |      |
| 1124 | <b>Image annotation.</b> Each input image is annotated in two                                                                                          |      |
| 1125 | versions: (1) with only a red “X” marking the target po-                                                                                               |      |
| 1126 | sition, and (2) with the “X” plus a blue directional arrow                                                                                             |      |
| 1127 | indicating the agent’s facing direction after rotation. The                                                                                            |      |
| 1128 | arrow version provides an additional spatial cue at evalua-                                                                                            |      |
| 1129 | tion time.                                                                                                                                             |      |
| 1130 | <b>Statistics.</b> The AI2-THOR training set contains 20,531                                                                                           |      |
| 1131 | examples across 98 scenes, with an average of $\sim 210$ ques-                                                                                         |      |
| 1132 | tions per scene.                                                                                                                                       |      |
|      | <b>8.2.2. Habitat</b>                                                                                                                                  | 1133 |
|      | <b>Scene source.</b> We use photorealistic 3D scans from HM3D                                                                                          | 1134 |
|      | (Habitat-Matterport 3D) [6] with semantic annotations.                                                                                                 | 1135 |
|      | Only single-floor scenes are selected (floor-level Y-variance                                                                                          | 1136 |
|      | $< 2.0$ m) to avoid cross-level ambiguities.                                                                                                           | 1137 |
|      | <b>Camera configuration.</b> Images are rendered at $1024 \times$                                                                                      | 1138 |
|      | $1024$ resolution with a horizontal field of view of 90. The                                                                                           | 1139 |
|      | sensor height is set to 1.25 m above the navigable floor sur-                                                                                          | 1140 |
|      | face, matching a standing human eye level.                                                                                                             | 1141 |
|      | <b>Target position and viewpoint.</b> Camera A (original view-                                                                                         | 1142 |
|      | point) is placed at a random navigable point with a random                                                                                             | 1143 |
|      | yaw. The target position (Camera B) is determined by se-                                                                                               | 1144 |
|      | lecting a visible object as an anchor: Camera B is placed                                                                                              | 1145 |
|      | at the object’s XZ coordinates, offset slightly along the fac-                                                                                         | 1146 |
|      | ing direction to avoid clipping into geometry, and snapped                                                                                             | 1147 |
|      | to the nearest navigable point on the mesh (within a 1.0 m                                                                                             | 1148 |
|      | snap radius). The ground-truth novel-viewpoint image is                                                                                                | 1149 |
|      | rendered at Camera B’s position and orientation.                                                                                                       | 1150 |
|      | <b>Object filtering.</b> We apply a strict whitelist of $\sim 70$ main-                                                                                | 1151 |
|      | stream furniture categories (seating, tables, beds, storage,                                                                                           | 1152 |
|      | appliances, bathroom fixtures) and exclude structural ele-                                                                                             | 1153 |
|      | ments (walls, floors, doors). Objects must occupy at least                                                                                             | 1154 |
|      | 0.8% of the image area in the original frame and at least                                                                                              | 1155 |
|      | 0.5% in the imagined frame. To avoid ambiguous refer-                                                                                                  | 1156 |
|      | ences, only objects whose category is <i>unique</i> in the frame                                                                                       | 1157 |
|      | are used ( <i>e.g.</i> , if two chairs are visible, neither is selected as                                                                             | 1158 |
|      | a question target). An edge margin of 200 px is applied.                                                                                               | 1159 |
|      | <b>Left/right determination.</b> Object laterality is determined                                                                                       | 1160 |
|      | by the mean x-coordinate of the object’s semantic segmen-                                                                                              | 1161 |
|      | tation mask in the rendered image, with a 180 px margin                                                                                                | 1162 |
|      | from the image center (512 px). Objects falling in the cen-                                                                                            | 1163 |
|      | ter zone ( $332 < x < 692$ ) are excluded as ambiguous.                                                                                                | 1164 |
|      | <b>Statistics.</b> The Habitat training set contains 19,998 exam-                                                                                      | 1165 |
|      | ples balanced across the six sub-categories.                                                                                                           | 1166 |
|      | <b>8.2.3. Real-World Data (VST)</b>                                                                                                                    | 1167 |
|      | To bridge the synthetic-to-real domain gap, the <i>mixed</i> train-                                                                                    | 1168 |
|      | ing variant incorporates 15,000 real-world examples drawn                                                                                              | 1169 |
|      | from the camera motion subset of the Visual Spatial Tuning                                                                                             | 1170 |
|      | (VST) dataset [37]. Each example contains a pair of multi-                                                                                             | 1171 |
|      | view images captured from different viewpoints in real in-                                                                                             | 1172 |
|      | door scenes, along with a question about the camera motion                                                                                             | 1173 |
|      | between them and a corresponding answer.                                                                                                               | 1174 |
|      | <b>Filtering uncertain answers.</b> We first filter out examples                                                                                       | 1175 |
|      | whose answers are uncertain or underspecified using GPT-                                                                                               | 1176 |
|      | 5.1, prompting it as a binary classifier. Any example whose                                                                                            | 1177 |
|      | answer contains phrases such as “cannot be determined,”                                                                                                | 1178 |
|      | “unknown,” or “insufficient information” is removed. The                                                                                               | 1179 |
|      | filtering prompt is:                                                                                                                                   | 1180 |

|      |                                                                  |                                                                             |  |      |
|------|------------------------------------------------------------------|-----------------------------------------------------------------------------|--|------|
| 1181 | <i>You are a binary classifier.</i>                              |                                                                             |  |      |
| 1182 | <i>Proposed Answer:</i>                                          |                                                                             |  |      |
| 1183 | <code>&lt;start_answer&gt;{A}&lt;end_answer&gt;</code>           |                                                                             |  |      |
| 1184 | <i>If the answer contains ANY of the following</i>               |                                                                             |  |      |
| 1185 | <i>phrases or meanings, output “NO”:</i>                         |                                                                             |  |      |
| 1186 | • <i>cannot be determined</i>                                    |                                                                             |  | 1230 |
| 1187 | • <i>insufficient information</i>                                |                                                                             |  | 1231 |
| 1188 | • <i>not enough information</i>                                  |                                                                             |  | 1232 |
| 1189 | • <i>unknown</i>                                                 |                                                                             |  |      |
| 1190 | • <i>unclear</i>                                                 |                                                                             |  |      |
| 1191 | • <i>cannot tell</i>                                             |                                                                             |  |      |
| 1192 | • <i>impossible to determine</i>                                 |                                                                             |  |      |
| 1193 | • <i>indeterminate</i>                                           |                                                                             |  |      |
| 1194 | <i>Only output “YES” if the answer clearly states a</i>          |                                                                             |  |      |
| 1195 | <i>specific, determined choice (e.g., a direction, lo-</i>       |                                                                             |  |      |
| 1196 | <i>cation, label, or concrete option).</i>                       |                                                                             |  |      |
| 1197 | <i>Output exactly one token: YES or NO.</i>                      |                                                                             |  |      |
| 1198 | <b>Rewriting into generation prompts.</b> After filtering, we    |                                                                             |  |      |
| 1199 | use GPT-5.1 to rewrite each question, answer pair into a         |                                                                             |  |      |
| 1200 | generation prompt describing the camera motion <i>from the</i>   |                                                                             |  |      |
| 1201 | <i>first image to the second.</i> This requires careful handling |                                                                             |  |      |
| 1202 | of reference frame direction: if the original question asks      |                                                                             |  |      |
| 1203 | where the first camera is relative to the second image, the      |                                                                             |  |      |
| 1204 | motion direction must be inverted before constructing the        |                                                                             |  |      |
| 1205 | prompt. The rewriting prompt is:                                 |                                                                             |  |      |
| 1206 | <i>You are given a question about camera motion be-</i>          |                                                                             |  |      |
| 1207 | <i>tween two images and its correct answer.</i>                  |                                                                             |  |      |
| 1208 | <b>IMPORTANT INVERSION RULE:</b>                                 |                                                                             |  |      |
| 1209 | • <i>If the question asks “where is the FIRST cam-</i>           |                                                                             |  |      |
| 1210 | <i>era relative to the SECOND image” (or uses</i>                |                                                                             |  |      |
| 1211 | <i>the second image as reference), then the answer</i>           |                                                                             |  |      |
| 1212 | <i>describes motion FROM second TO first.</i>                    |                                                                             |  |      |
| 1213 | • <i>In this case, you MUST invert the direction to</i>          |                                                                             |  |      |
| 1214 | <i>get motion FROM first TO second.</i>                          |                                                                             |  |      |
| 1215 | • <i>If the question asks “where is the SECOND</i>               |                                                                             |  |      |
| 1216 | <i>camera relative to the FIRST image” (or uses</i>              |                                                                             |  |      |
| 1217 | <i>the first image as reference), NO inversion is</i>            |                                                                             |  |      |
| 1218 | <i>needed.</i>                                                   |                                                                             |  |      |
| 1219 | <b>STEPS:</b>                                                    |                                                                             |  |      |
| 1220 | 1. <i>Determine which image is the reference point</i>           |                                                                             |  |      |
| 1221 | <i>in the question.</i>                                          |                                                                             |  |      |
| 1222 | 2. <i>If the reference is the second image, invert the</i>       |                                                                             |  |      |
| 1223 | <i>direction in the answer.</i>                                  |                                                                             |  |      |
| 1224 | 3. <i>Using the final motion FROM first TO second,</i>           |                                                                             |  |      |
| 1225 | <i>create a generation prompt.</i>                               |                                                                             |  |      |
| 1226 | <b>INVERSION EXAMPLES:</b>                                       |                                                                             |  |      |
| 1227 | • <i>“right” → “left”</i>                                        |                                                                             |  |      |
| 1228 | • <i>“left” → “right”</i>                                        |                                                                             |  |      |
| 1229 | • <i>“front” → “back”</i>                                        |                                                                             |  |      |
|      |                                                                  | • <i>“back” → “front”</i>                                                   |  | 1230 |
|      |                                                                  | • <i>“front left” → “back right”</i>                                        |  | 1231 |
|      |                                                                  | • <i>“back right” → “front left”</i>                                        |  | 1232 |
|      |                                                                  | <i>Your output should start with “generate” and</i>                         |  | 1233 |
|      |                                                                  | <i>describe viewing the scene from the new camera</i>                       |  | 1234 |
|      |                                                                  | <i>position after applying the motion from the first</i>                    |  | 1235 |
|      |                                                                  | <i>image.</i>                                                               |  | 1236 |
|      |                                                                  | <i>Question:</i> <code>&lt;start_question&gt;{Q}&lt;end_question&gt;</code> |  | 1237 |
|      |                                                                  | <i>Answer:</i> <code>&lt;start_answer&gt;{A}&lt;end_answer&gt;</code>       |  | 1238 |
|      |                                                                  | <i>First, identify the reference image. Then apply</i>                      |  | 1239 |
|      |                                                                  | <i>inversion if needed. Then generate your output.</i>                      |  | 1240 |
|      |                                                                  | The resulting generation prompts condition the model on                     |  | 1241 |
|      |                                                                  | the first view and the inferred camera motion, with the sec-                |  | 1242 |
|      |                                                                  | ond view serving as the imaginative perception target. Be-                  |  | 1243 |
|      |                                                                  | cause no programmatic 3D annotation is available for these                  |  | 1244 |
|      |                                                                  | real scenes, this data serves as a domain bridge rather than                |  | 1245 |
|      |                                                                  | a source of the full six-sub-category question format.                      |  | 1246 |
|      |                                                                  | <b>Mixed training composition.</b> The mixed PET training                   |  | 1247 |
|      |                                                                  | variant combines AI2-THOR (20,531), Habitat (19,998),                       |  | 1248 |
|      |                                                                  | and VST (15,000) examples, totaling 55,529 samples.                         |  | 1249 |
|      |                                                                  | <b>8.3. Multiview Counting</b>                                              |  | 1250 |
|      |                                                                  | We construct multiview counting data from both synthetic                    |  | 1251 |
|      |                                                                  | and real-image sources. Our main training set is generated                  |  | 1252 |
|      |                                                                  | from ProcTHOR/AI2-THOR environments, which provide                          |  | 1253 |
|      |                                                                  | full 3D supervision for both egocentric observations and                    |  | 1254 |
|      |                                                                  | top-down bird’s-eye-view (BEV) targets. To complement                       |  | 1255 |
|      |                                                                  | this synthetic source, we additionally curate two real-image                |  | 1256 |
|      |                                                                  | multiview counting sets from MessyTable and ScanNet++,                      |  | 1257 |
|      |                                                                  | which expose the model to real visual appearance and par-                   |  | 1258 |
|      |                                                                  | tial observability under natural image statistics.                          |  | 1259 |
|      |                                                                  | <b>8.3.1. ProcTHOR / AI2-THOR</b>                                           |  | 1260 |
|      |                                                                  | We generate the main multiview counting training set from                   |  | 1261 |
|      |                                                                  | AI2-THOR environments, using two trajectory types that                      |  | 1262 |
|      |                                                                  | capture complementary modes of partial observability.                       |  | 1263 |
|      |                                                                  | <b>Trajectory types.</b>                                                    |  | 1264 |
|      |                                                                  | • <b>Rotation:</b> The agent remains at a fixed position and ro-            |  | 1265 |
|      |                                                                  | tates in 90° increments through four cardinal directions                    |  | 1266 |
|      |                                                                  | (0°, 90°, 180°, 270°), producing four frames that together                  |  | 1267 |
|      |                                                                  | cover a 360° panorama of the surrounding area.                              |  | 1268 |
|      |                                                                  | • <b>Multi-camera:</b> The agent traverses a square path, cap-              |  | 1269 |
|      |                                                                  | turing one frame at each of four corners. This setup sim-                   |  | 1270 |
|      |                                                                  | ulates a multi-camera rig where viewpoints are spatially                    |  | 1271 |
|      |                                                                  | distributed around the scene.                                               |  | 1272 |
|      |                                                                  | Both trajectory types produce exactly four input frames per                 |  | 1273 |
|      |                                                                  | sample.                                                                     |  | 1274 |
|      |                                                                  | <b>Bird’s-eye view (BEV) generation.</b> The ground-truth in-               |  | 1275 |
|      |                                                                  | termediate image is a top-down BEV map rendered from an                     |  | 1276 |

|      |                                                                    |                                                                |      |
|------|--------------------------------------------------------------------|----------------------------------------------------------------|------|
| 1277 | overhead camera in the 3D scene. To ensure the BEV only            | 10% from the singleton bucket. Input images are selected       | 1323 |
| 1278 | covers the <i>explored</i> area (the region visible from the input | from the eight surrounding non-top cameras, with priority      | 1324 |
| 1279 | frames), we crop the map with trajectory-aware padding:            | given to views in which the target category is absent. When    | 1325 |
| 1280 | 5 m around the agent position for rotation trajectories and        | too few such views exist, they are supplemented with addi-     | 1326 |
| 1281 | 4 m around the traversed path for multi-camera trajectories.       | tional non-adjacent views to maintain viewpoint diversity.     | 1327 |
| 1282 | Object counts in the cropped BEV are validated against the         | This makes the final count require aggregation across mul-     | 1328 |
| 1283 | segmentation maps to ensure consistency.                           | multiple views rather than inspection of a single image.       | 1329 |
| 1284 | <b>Object filtering and category balancing.</b> Structural ele-    | <b>Top-view supervision and question generation.</b> Each      | 1330 |
| 1285 | ments (walls, floors, ceilings, doorways) are excluded from        | sample also stores the canonical top-view image as the rea-    | 1331 |
| 1286 | counting targets. Target objects must be visible in both the       | soning target. In the exported JSONL format, image inputs      | 1332 |
| 1287 | first-person frames and the cropped top-down segmentation          | use centered crops derived from the union of all annotated     | 1333 |
| 1288 | map (with a minimum coverage of 0.1%). Because initial             | object boxes in each selected camera view, which reduces       | 1334 |
| 1289 | generation heavily favors count= 1 questions (~82%), we            | empty borders while preserving the visible object layout.      | 1335 |
| 1290 | apply iterative rebalancing: high-frequency categories are         | Questions are instantiated from a diverse pool of natural-     | 1336 |
| 1291 | capped at 9.9% of the dataset, and count= 1 samples are            | language counting templates such as “How many {object}         | 1337 |
| 1292 | downsampled. This produces a more uniform distribution             | are in this scene?”                                            | 1338 |
| 1293 | across object categories and count values.                         | <b>8.3.3. ScanNet++</b>                                        | 1339 |
| 1294 | <b>Question format and distractor generation.</b> Questions        | We further construct a real indoor multiview counting          | 1340 |
| 1295 | follow the template: “How many {category}(s) are in this           | set from ScanNet++ [41], using iPhone image trajectories       | 1341 |
| 1296 | area?” with four answer choices (A–D). Distractors are             | paired with labeled 3D scene reconstructions. Compared         | 1342 |
| 1297 | sampled from $\pm 1$ and $\pm 2$ of the correct count, producing   | with MessyTable, this set covers larger indoor spaces, more    | 1343 |
| 1298 | plausible alternatives. Negative counts are removed, and           | varied viewpoints, and more realistic household layouts.       | 1344 |
| 1299 | the four options are shuffled with a per-sample determinis-        | <b>Top-down map and candidate view generation.</b> For         | 1345 |
| 1300 | tic seed to eliminate positional bias.                             | each scene, we first generate a top-down map from the          | 1346 |
| 1301 | <b>Statistics.</b> The synthetic training set contains 17,079 ex-  | labeled 3D reconstruction. Because raw point-cloud ren-        | 1347 |
| 1302 | amples generated from ProcTHOR [10] scenes, covering               | derings are visually sparse and unrealistic, we further use    | 1348 |
| 1303 | both trajectory types.                                             | Qwen-Image-Edit [32] to transform the rendered top-down        | 1349 |
| 1304 | <b>8.3.2. MessyTable</b>                                           | visualization into a more realistic top-down image while       | 1350 |
| 1305 | To expose the model to real tabletop imagery with severe           | preserving the scene layout. We then build a candidate ego-    | 1351 |
| 1306 | clutter and occlusion, we construct an additional multiview        | centric view pool by combining a small set of canonical        | 1352 |
| 1307 | counting set from MessyTable [4]. Each scene contains              | iPhone views with additional randomly sampled frames, re-      | 1353 |
| 1308 | multiple camera views of the same tabletop arrangement to-         | quiring each extra frame to differ from the canonical views    | 1354 |
| 1309 | gether with instance-level annotations.                            | by at least a minimum yaw angle.                               | 1355 |
| 1310 | <b>Scene-level counting targets.</b> For each scene, we aggre-     | <b>Visibility estimation and target selection.</b> We estimate | 1356 |
| 1311 | gate annotations across all cameras and de-duplicate in-           | which object instances are visible in each candidate frame     | 1357 |
| 1312 | stance IDs across views, so that the ground-truth answer           | by projecting the labeled 3D scene into the camera views       | 1358 |
| 1313 | corresponds to the number of unique physical objects rather        | using mesh ray-casting, and use the semantic annotations       | 1359 |
| 1314 | than the sum of per-view detections. Counting targets are          | to obtain scene-level category counts. Top-down maps are       | 1360 |
| 1315 | defined at the subclass level and mapped to readable cate-         | filtered by automatic quality rules to remove blurry, blank,   | 1361 |
| 1316 | gory names.                                                        | or low-texture renderings. Candidate counting targets are      | 1362 |
| 1317 | <b>Target and view sampling.</b> For each scene, we sample         | restricted to non-structural object categories with bounded    | 1363 |
| 1318 | one target category from the categories present in the scene.      | scene-level counts and sufficient visible support in the       | 1364 |
| 1319 | To reduce the dominance of trivial singleton cases, sam-           | candidate views. To avoid metadata leakage, target selection   | 1365 |
| 1320 | pling is biased toward categories with count $\geq 2$ : when both  | is performed in a blind setting: the model is shown the top-   | 1366 |
| 1321 | singleton and multi-instance categories are available, 90%         | down image and candidate labels, but not their annotated       | 1367 |
| 1322 | of samples are drawn from the multi-instance bucket and            | counts, and we keep only categories whose visually pre-        | 1368 |
|      |                                                                    | dicted count matches the ground truth. When multiple valid     | 1369 |
|      |                                                                    | categories remain, we preferentially sample categories with    | 1370 |
|      |                                                                    | counts greater than one.                                       | 1371 |



## Path Tracing: Inference with Imaginative Perception Tokens

**Question:** You are moving along the path 2→1 as shown in the top-down view <image\_1>. Looking ahead from point 2, you see: <image\_2>. Looking ahead from point 1, you see: <image\_3>. Which object can you see on your **left** side at waypoint M1?

A: the sink basin    **B: the garbage can ✓**    C: the towel    D: the cloth    **✓ Correct**

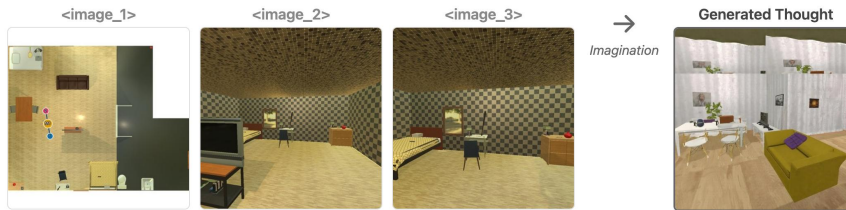

"My left view at the midpoint M1:"

**Question:** You are navigating from waypoint 2 to waypoint 1 and passing through M1, as shown in the top-down view <image\_1>. Here's your view looking forward from point 2: <image\_2>. And from point 1: <image\_3>. Which object can you see on your **left** side at waypoint M1?

**A: the countertop ✓**    B: the chair    C: the dining table    D: the garbage bag    **✓ Correct**

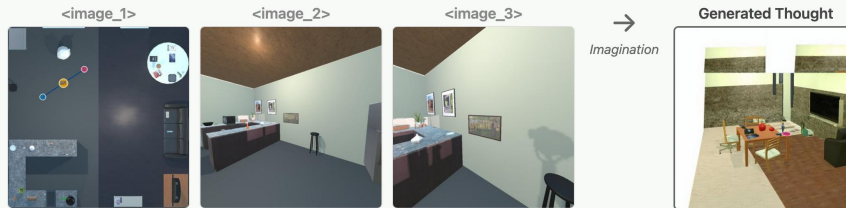

"At midpoint M1, looking to the left, I see:"

**Question:** You are moving along the path 2→1, and you should refer to the top-down view at <image\_1>. Looking ahead from point 2, you see: <image\_2>. Looking ahead from point 1, you see: <image\_3>. Which object can you see on your **right** side at waypoint M1?

A: a sink basin    **B: a garbage can ✓**    **C: a pot ✗**    D: a pepper shaker    **✗ Incorrect**

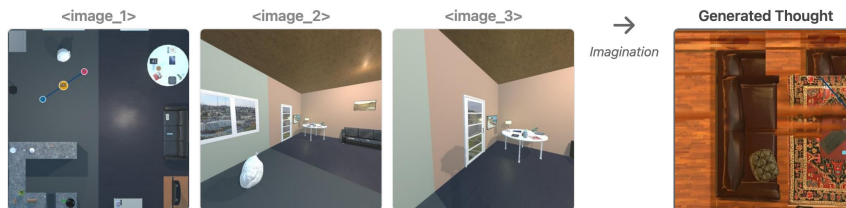

"At midpoint M1, looking to the right, I see:"

Figure 4. **Path tracing with imaginative perception tokens (EgoDir setting).** The model receives a top-down map (<image\_1>) and egocentric views at the two endpoints (<image\_2>, <image\_3>), generates a visual thought (imagined sideview at  $M_1$ ), and predicts an answer. Although the generated thoughts exhibit spatial imprecision and artifacts, the model still arrives at the correct answer in the first two examples, suggesting that imagination training encourages internalized spatial reasoning rather than reliance on pixel-accurate intermediate outputs. The third row shows a failure case. Correct answers are highlighted in green; incorrect predictions in red.

1468 discrete imaginative perception tokens directly to the language model vocabulary of state-of-the-art vision-language models. Inspired by Aurora [2], we first trained a VQ-

VAE from scratch on the intermediate RGB images in our datasets, including novel viewpoint renders, top-down BEV maps, and sideview images. However, the reconstruction

1471  
1472  
1473

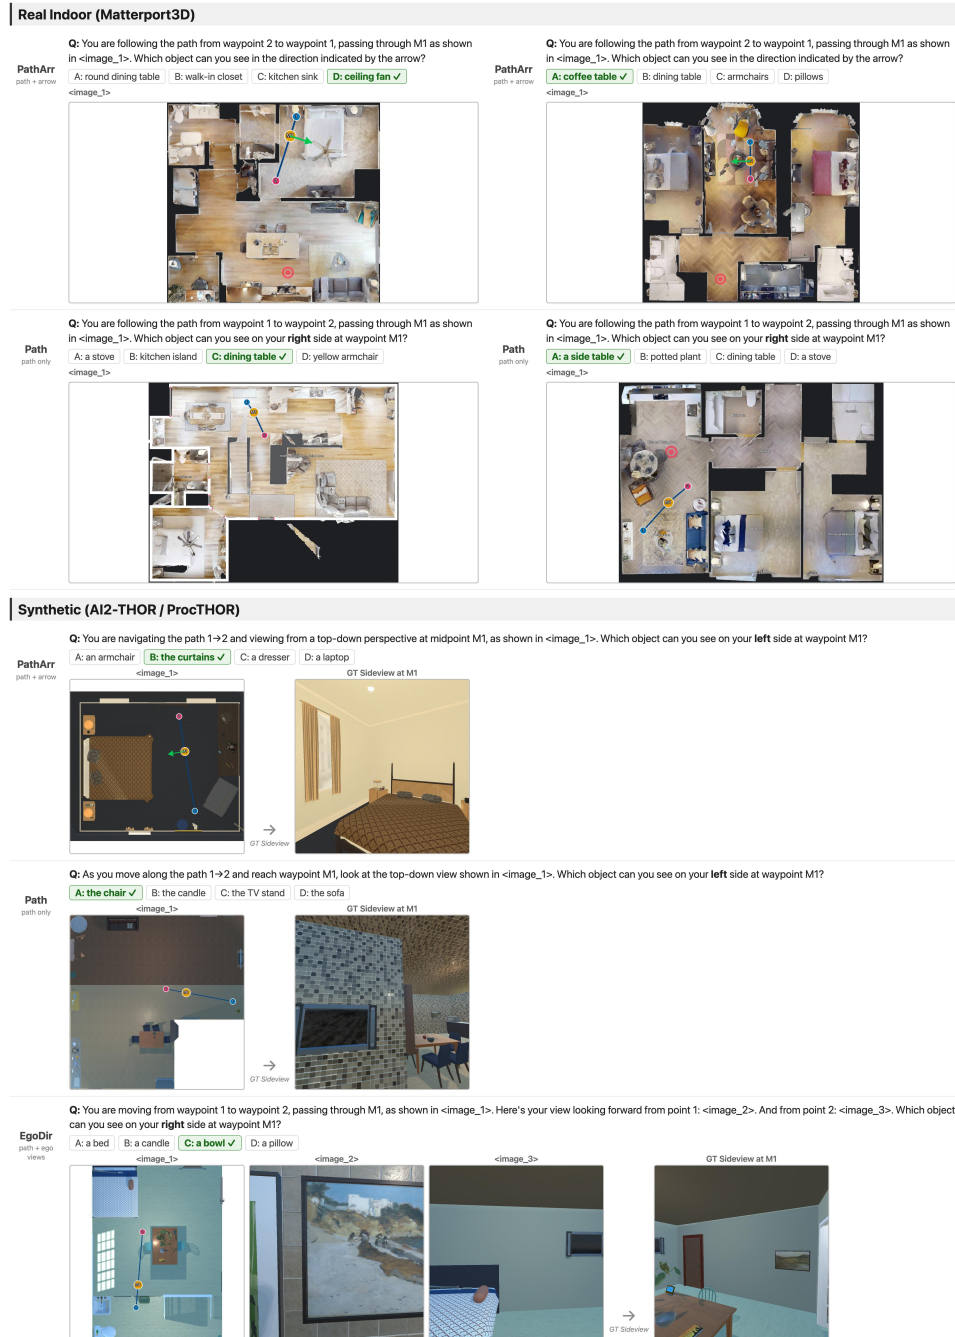

Figure 5. **Path tracing dataset examples.** Top: real-world examples from Matterport3D in the PathArr and Path settings. Bottom: synthetic examples from AI2-THOR/ProcTHOR in the PathArr, Path, and EgoDir settings, with ground-truth sideviews at midpoint  $M_1$  shown on the right. Each example shows the input image(s), question, and four answer choices with the correct answer highlighted.

1474 quality of these simple VQ-VAEs was insufficient for su-  
1475 pervising models on their intermediate token sequences as  
1476 image outputs.

1477 We therefore switched to off-the-shelf pretrained VQ-  
1478 GANs [14] with varying configurations. These configura-

tions differ along two axes: codebook size (e.g., 1K, 8K, 1479  
and 16K entries) and spatial downsampling ratio ( $f = 8$  vs. 1480  
 $f = 16$ ). Each choice involves a tradeoff: a larger codebook 1481  
improves representational fidelity but inflates the model voc- 1482  
abulary, while a smaller downsampling ratio yields higher 1483

## Perspective Taking: Inference with Imaginative Perception Tokens

**Question:** If someone at this viewpoint moves to the 'X' on the ground while maintaining their orientation, then rotates right 90 degrees, will the window be closer or further to them?

Distance — Closer

A: Further  B: Closer  ✓ Correct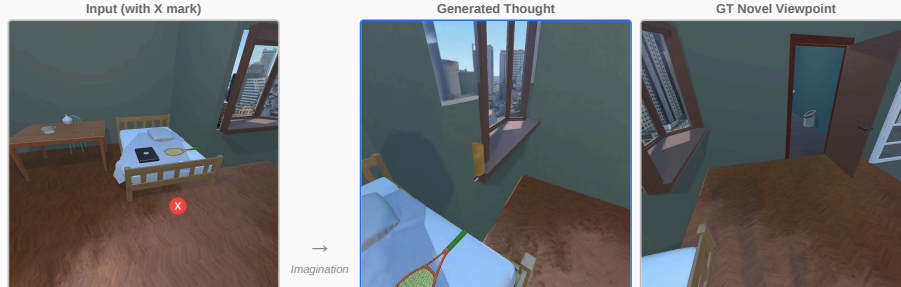

**Question:** This image shows my current perspective. If I move straight to the 'X' marked point on the ground while keeping my orientation, then turn left for 90 degrees, will the chair be on my left or right?

Position — Left - Right

A: left  B: right  ✓ Correct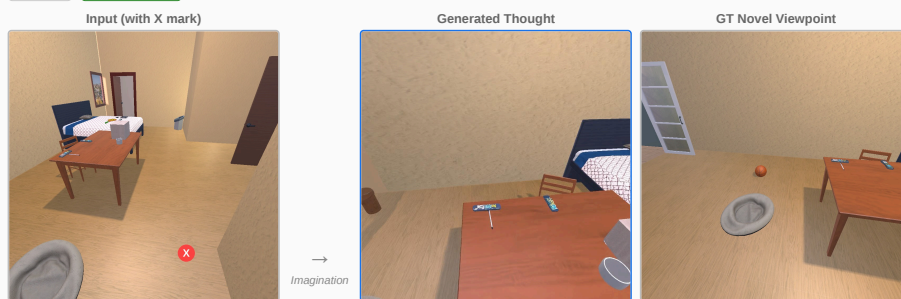

**Question:** After reaching the 'X' position on the ground while keeping my current orientation, then making a 90-degree turn left, on which side will the sofa be - left or right?

Position — Left - Left

A: right  X B: left  ✓ X Incorrect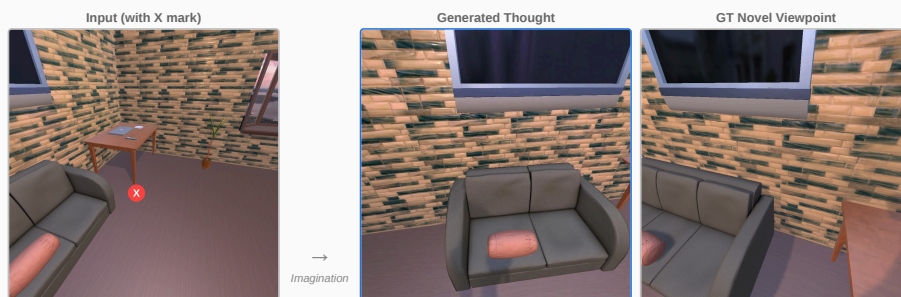

Figure 6. **Perspective taking with imaginative perception tokens.** The model receives an input view with an “X” mark on the ground, imagines the scene from the target viewpoint, and predicts spatial relationships. Generated thoughts are compared against ground-truth novel viewpoints. Correct answers are highlighted in green; incorrect predictions in red.

1484 reconstruction quality at the cost of a longer token sequence  
1485 per image, increasing context length. Figure 10 illustrates  
1486 reconstruction quality across these settings.

1487 We selected Qwen2.5-VL [32] in two sizes (3B and 7B)  
1488 as our backbone for discrete token finetuning experiments.

We note that the training data at this stage was of lower  
1489 quality than our final datasets described in main text; these  
1490 experiments were intended solely to probe whether discrete  
1491 imaginative perception tokens can serve as a useful inter-  
1492 mediate, not to achieve peak performance. We focused on  
1493

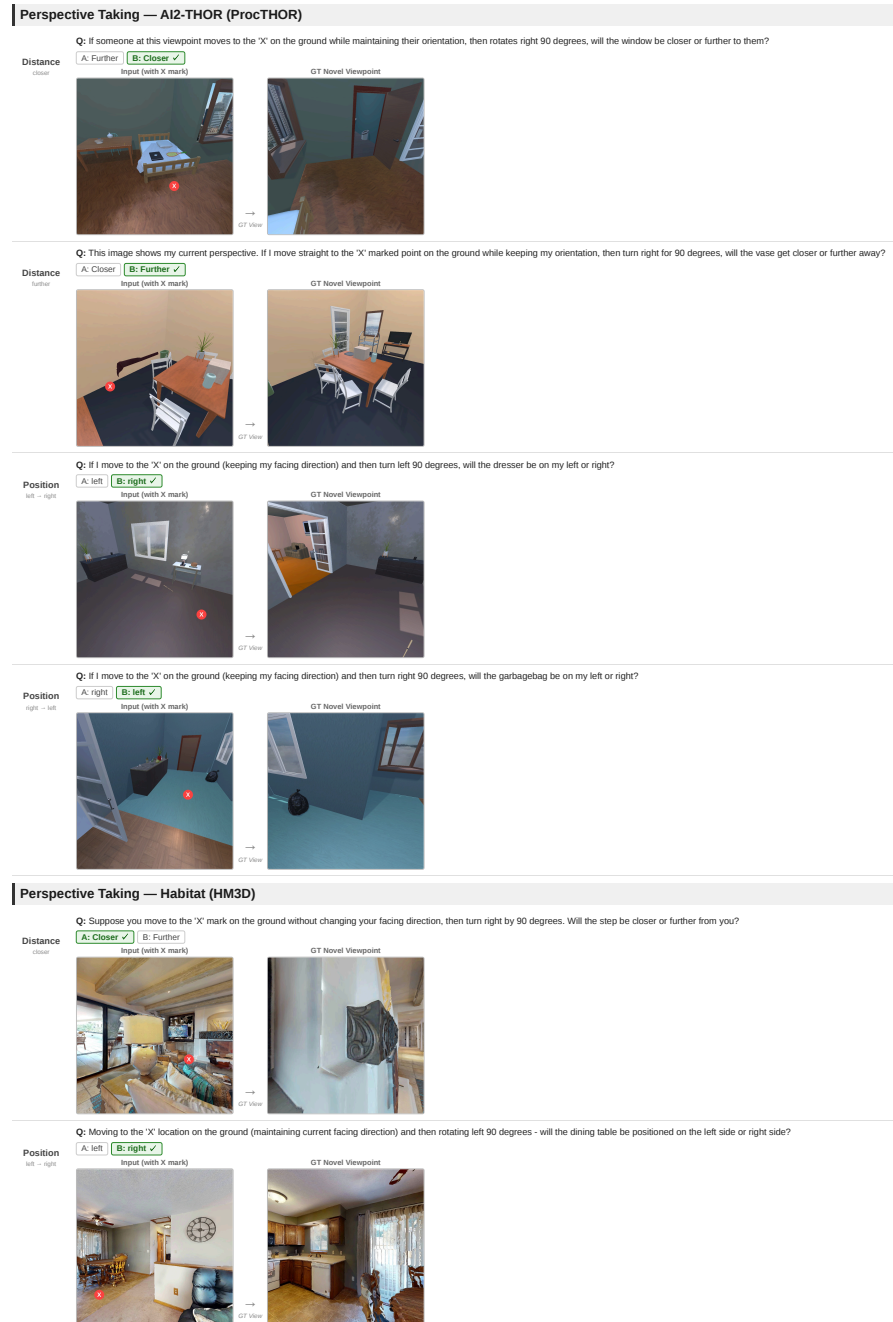

Figure 7. **Perspective taking dataset examples.** Examples from AI2-THOR/ProctHOR across the four sub-categories. Each example shows the input view with “X” mark and the ground-truth novel viewpoint. The correct answer is highlighted in green.

1494 Path Tracing (PT) and Perspective Taking (PET).

1495 For each model we trained three variants: answer-only  
1496 finetuning, Text CoT, and image chain-of-thought with discrete  
1497 IPTs, where the VQGAN codebook tokens are appended to the model  
1498 vocabulary and the model first autoregressively generates the imaginative  
1499 perception token se-

quence before predicting the final answer plus a zeroshot  
1500 baseline. For IPT variants we tested two VQGAN settings  
1501 that keep sequence length manageable: CB 16K  $f=16$  and  
1502 CB 1K  $f=16$ . Results are shown in Table [II](#).  
1503

IPT consistently outperforms both answer-only finetuning  
1504 and Text CoT on Path Tracing, with CB 1K  $f=16$  yield-  
1505

1506 ing the best results for both model sizes (55.0 for 3B, 55.9  
1507 for 7B). On Perspective Taking, gains are modest and near  
1508 the zero-shot baseline, suggesting that lower data quality  
1509 and the representational limitations of discrete token recon-  
1510 struction are a bottleneck for this more visually demand-  
1511 ing task. A substantial gap remains relative to our final  
1512 BAGEL-based results, motivating the move to a unified  
1513 model.

1514 Figure 11 shows ground-truth imagination images along-  
1515 side the corresponding IPTs decoded from the Qwen2.5-  
1516 VL 3B model. The decoded outputs are visually degraded,  
1517 lacking the spatial structure and object detail present in the  
1518 ground truth, which helps explain the remaining perfor-  
1519 mance gap and further motivated our switch to continuous  
1520 latent representations.

1521 We further investigated alternative intermediate image  
1522 representations. Instead of training the model to generate  
1523 imaginative perception tokens for RGB thought images, we  
1524 replaced them with tokens for grayscale images and tokens  
1525 for pseudo depth maps obtained from the DepthAnything  
1526 model [36]. The intuition is that simplifying the generation  
1527 target, from full RGB to grayscale, reduces the difficulty of  
1528 the token prediction task and may improve spatial reasoning  
1529 downstream. Results in Table 12 show that switching from  
1530 RGB to grayscale does boost performance (55.0→59.6 on  
1531 PT, 50.0→55.5 on PET), while depth tokens perform com-  
1532 parably to RGB. Nevertheless, a substantial gap remains,  
1533 and Figure 12 shows that the decoded grayscale outputs  
1534 are still visually degraded, indicating that generation quality  
1535 rather than representation type is the primary bottleneck.

1536 Figure 12 shows ground-truth imagination images along-  
1537 side the corresponding IPTs decoded from the Qwen2.5-  
1538 VL 3B model. The decoded outputs are visually degraded,  
1539 lacking the spatial structure and object detail present in the  
1540 ground truth, which helps explain the remaining perfor-  
1541 mance gap and further motivated our switch to continuous  
1542 latent representations.

1543 These findings collectively motivated us to move away  
1544 from discrete token generation in non-unified VLMs and in-  
1545 stead adopt a unified model: BAGEL, that natively supports  
1546 interleaved image understanding and generation through  
1547 continuous latent representations.

Table 10. **Path tracing per-split results.** Accuracy (%) broken down by input setting. The main paper reports the average across these splits. For our models, accuracy reports the maximum between answer-only and free-generation inference. Best per group in **bold**.

| Model                          | AI2-THOR    |             |             | Different Env. |             |
|--------------------------------|-------------|-------------|-------------|----------------|-------------|
|                                | EgoDir      | Path        | PathArr     | Real           | Real+Arr    |
| <i>VQA Models</i>              |             |             |             |                |             |
| GPT-5                          | <b>61.1</b> | <b>56.8</b> | <b>62.6</b> | <b>74.5</b>    | 87.3        |
| GPT-5.2                        | 22.1        | 40.2        | 36.3        | 57.5           | 68.4        |
| Gemini 2.5 Flash               | 45.1        | 37.9        | 41.5        | 58.0           | 84.8        |
| Gemini 3 Flash                 | 48.7        | 39.1        | 39.2        | 70.1           | <b>96.2</b> |
| InternVL3.5-8B                 | 43.4        | 29.0        | 35.1        | 45.4           | 49.4        |
| Qwen2.5-VL-7B                  | 44.2        | 32.5        | 35.1        | 47.1           | 42.4        |
| Qwen3-VL-8B                    | 31.9        | 33.7        | 42.1        | 52.9           | 75.3        |
| <i>Unified Models</i>          |             |             |             |                |             |
| Janus-Pro-7B                   | 36.3        | 30.2        | 33.9        | 34.5           | 36.1        |
| Chameleon 7B                   | 5.3         | 23.7        | 19.9        | 23.0           | 25.9        |
| <i>Ours (fine-tuned BAGEL)</i> |             |             |             |                |             |
| Bagel (base)                   | 36.3        | 26.0        | 27.5        | 39.7           | 45.6        |
| Bagel (label-only)             | <b>73.5</b> | 61.5        | 62.0        | 46.6           | 62.7        |
| + Text CoT                     | 53.1        | 47.9        | 48.0        | <b>52.3</b>    | 51.3        |
| + IPT                          | 61.1        | 43.2        | 42.7        | 46.6           | <b>68.4</b> |
| + Mixed Training               | 71.7        | <b>65.1</b> | <b>63.2</b> | 50.6           | 66.5        |

Table 11. **Discrete IPT experiments on Qwen2.5-VL.** Accuracy (%) on Path Tracing (PT) and Perspective Taking (PET). Training data at this stage was of lower quality than the final datasets. “-” denotes experiments not conducted.

| Model         | Method                | PT          | PET  |
|---------------|-----------------------|-------------|------|
| Qwen2.5-VL 3B | Zero-shot             | 33.0        | 50.0 |
|               | Answer-only           | 48.6        | 50.5 |
|               | Text CoT              | 43.0        | -    |
|               | IPT (CB 16K, $f=16$ ) | 50.5        | 48.5 |
|               | IPT (CB 1K, $f=16$ )  | <b>55.0</b> | 50.0 |
| Qwen2.5-VL 7B | Zero-shot             | 38.5        | 47.2 |
|               | Answer-only           | 37.6        | -    |
|               | Text CoT              | 35.7        | -    |
|               | IPT (CB 16K, $f=16$ ) | 55.0        | -    |
|               | IPT (CB 1K, $f=16$ )  | <b>55.9</b> | -    |

**Multiview Counting: Inference with Imaginative Perception Tokens**

**Question: How many sofa(s) are in this area?** Rotation — 4 cardinal dirs

A: 4 **B: 1 ✓** C: 2 D: 3 ✓ Correct

Input Views (4 frames) Generated Thought GT Top-Down Map

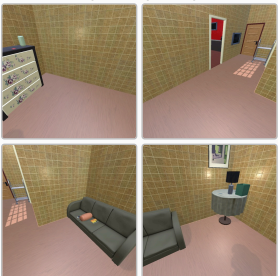

Imagination

🗨️ "The top-down view of this area is:"

**Question: How many bed(s) are in this area?** Multi-camera — square path

A: 2 ✓ B: 3 C: 1 D: 4 ✓ Correct

Input Views (4 frames) Generated Thought GT Top-Down Map



Imagination

🗨️ "The top-down view of this area is:"

**Question: How many stool(s) are in this area?** Rotation — 4 cardinal dirs

A: 2 ✗ **B: 3 ✓** C: 4 D: 1 ✗ Incorrect

Input Views (4 frames) Generated Thought GT Top-Down Map



Imagination

🗨️ "The top-down view of this area is:"

Figure 8. **Multiview counting with imaginative perception tokens.** The model receives four egocentric views, imagines a top-down BEV map, and counts target objects. Generated thoughts are compared against ground-truth top-down maps. Correct answers are highlighted in green; incorrect predictions in red.

**Multiview Counting — AI2-THOR (ProcTHOR) — Rotation Trajectory**

Q: Count the number of coffee-table(s) visible in the explored area.

Rotation  A.4  B.2  C.3  B.3 ✓

Input Views (4 frames) GT Top-Down Map

---

Q: How many tostand(s) are in this area?

Rotation  A.3  B.2  C.4  B.3 ✓

Input Views (4 frames) GT Top-Down Map

---

**Multiview Counting — AI2-THOR (ProcTHOR) — Multi-Camera Trajectory**

Q: How many chair(s) are in this area?

Multi-cam  A.6 ✓  B.5  C.7  D.4

Input Views (8 frames) GT Top-Down Map

---

**Multiview Counting — MessyTable (Real Tabletop Photos)**

Q: Please compute the number of banana in this scene.

Real Photo  Answer: 3

Input Views (2 frames) GT Reasoning Image

---

Q: Can you count the vacuum-packed bagged snack in this scene?

Real Photo  Answer: 2

Input Views (4 frames) GT Reasoning Image

---

**Multiview Counting — ScanNet (Real Indoor Scenes)**

Q: What is the total number of office chairs in this scene?

Real Photo  Answer: 8

Input Views (4 frames) GT Reasoning Image

---

Q: What is the total count of bed pillows in this scene?

Real Photo  Answer: 3

Input Views (4 frames) GT Reasoning Image

Figure 9. **Multiview counting dataset examples.** Examples from AI2-THOR/ProcTHOR showing both rotation (top) and multi-camera (bottom) trajectories. Each example shows four input views in a  $2 \times 2$  grid and the ground-truth top-down map. The correct answer is highlighted in green.

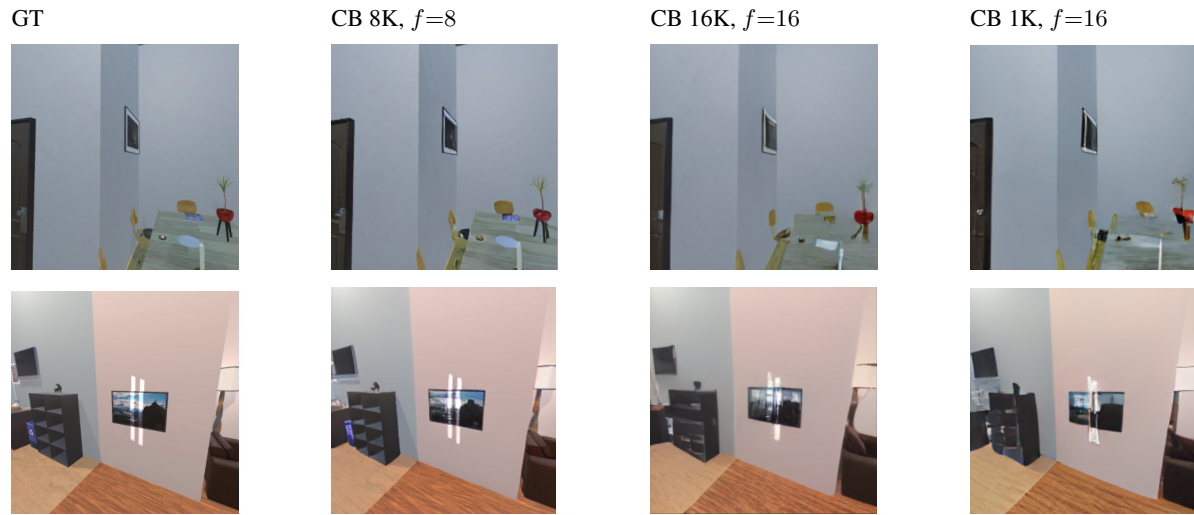

Figure 10. **VQGAN reconstruction quality across codebook and downsampling settings.** Larger codebooks and smaller  $f$  improve fidelity but increase vocabulary size and sequence length respectively.

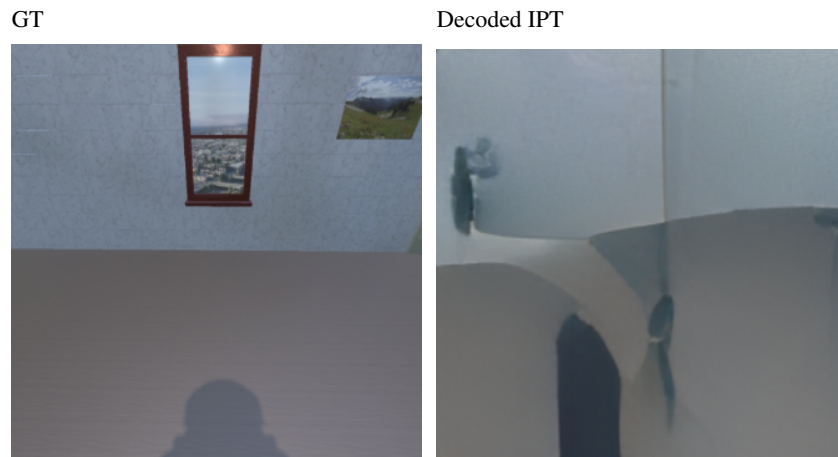

Figure 11. **Ground-truth vs. decoded IPTs from Qwen2.5-VL 3B.** The model-generated imagination tokens decode into visually degraded images that fail to preserve the spatial structure of the ground truth, highlighting the limitations of discrete token generation in non-unified VLMs.

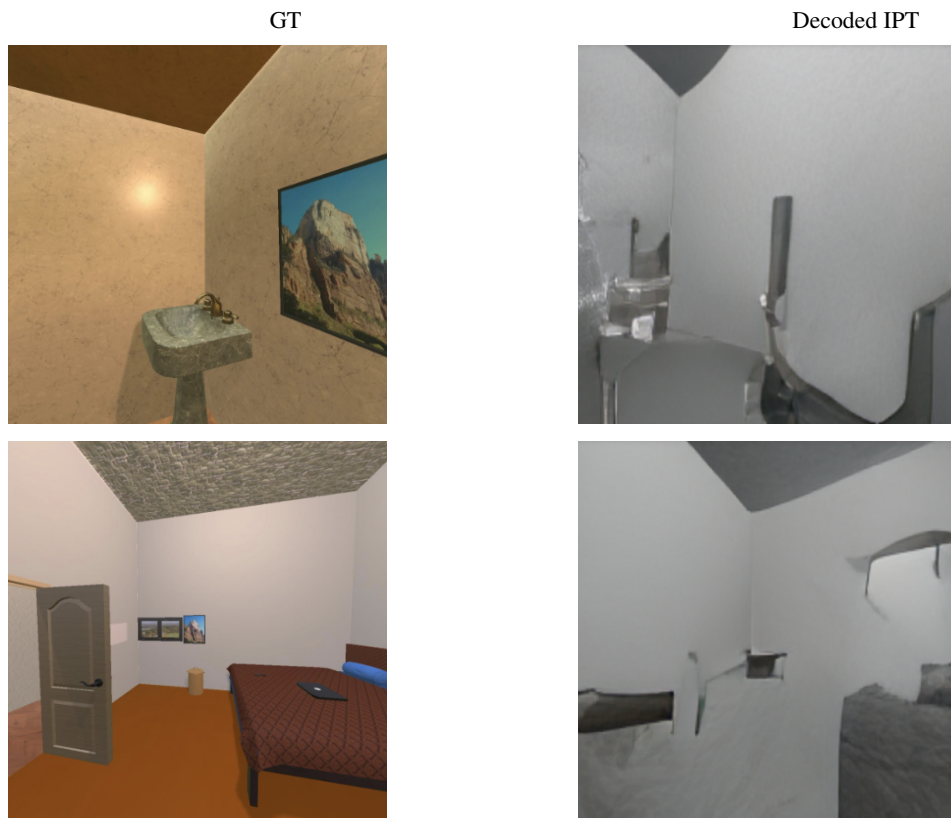

Figure 12. **Decoded IPTs from Qwen2.5-VL 3B for grayscale representations.** Despite the simpler generation target, grayscale decoded outputs remain visually degraded and fail to preserve spatial structure.

Table 12. **Effect of intermediate image representation on Qwen2.5-VL 3B.** Accuracy (%) on Path Tracing (PT) and Perspective Taking (PET).

| <b>Method</b>                  | <b>PT</b>   | <b>PET</b>  |
|--------------------------------|-------------|-------------|
| IPT RGB (CB 1K, $f=16$ )       | 55.0        | 50.0        |
| IPT Grayscale (CB 1K, $f=16$ ) | <b>59.6</b> | <b>55.5</b> |
| IPT Depth (Aurora VQVAE)       | 55.0        | 54.7        |
